# Supplementary material for: Decoupling of the PI3K Pathway via Mutation Necessitates Combinatorial Treatment in HER2+ Breast Cancer
Source: PLoS One. 2015 Jul 16;10(7):e0133219. doi: 10.1371/journal.pone.0133219 (PMC4504492; doi:10.1371/journal.pone.0133219)
Supplement: S2 Dataset — (XLSX) [file pone.0133219.s002.xlsx]

## Sheet: Sheet1
Gene Name	YWHAB	YWHAE	YWHAZ	EIF4EBP1	EIF4EBP1	EIF4EBP1	TP53BP1	ACACA ACACB	ACACA	ACVRL1	AKT1 AKT2 AKT3	AKT1 AKT2 AKT3	AKT1 AKT2 AKT3	PRKAA1	PRKAA1	ANXA7	AR	BAD	BAK1	BAX	BCL2	BCL2L1	BECN1	CTNNB1	BID	BCL2L11	BRCA2	JUN	KIT	MET	MET	MYC	RAF1	RAF1	CASP7	CASP8	CAV1	PECAM1	ITGA2	CDC2	CHEK1	CHEK1	CHEK2	CHEK2	CLDN7	COL6A1	CCNB1	CCND1	CCNE1
Probabilities ( QC Score > 0.8)	0.959329	0.948414	0.977267	0.97889	0.97517	0.967084	0.983597	0.972141	0.962938	0.942665	0.981451	0.972239	0.966138	0.97722	0.974168	0.973135	0.967112	0.959462	0.966702	0.964867	0.951896	0.95799	0.949606	0.982834	0.939974	0.951774	0.910237	0.887652	0.849612	0.971149	0.970815	0.968853	0.974894	0.984637	0.938392	0.972206	0.946875	0.943626	0.973973	0.941692	0.960731	0.962473	0.981446	0.953114	0.975635	0.965644	0.979801	0.96248	0.978052
Antibody Name in Heatmap	14-3-3_beta-R-V	14-3-3_epsilon-M-C	14-3-3_zeta-R-V	4E-BP1-R-V	4E-BP1_pS65-R-V	4E-BP1_pT37_T46-R-V	53BP1-R-E	ACC_pS79-R-V	ACC1-R-E	ACVRL1-R-C	Akt-R-V	Akt_pS473-R-V	Akt_pT308-R-V	AMPK_alpha-R-C	AMPK_pT172-R-V	Annexin_VII-M-V	AR-R-V	Bad_pS112-R-V	Bak-R-E	Bax-R-V	Bcl-2-M-V	Bcl-xL-R-V	Beclin-G-C	beta-Catenin-R-V	Bid-R-C	Bim-R-V	BRCA2-R-C	c-Jun_pS73-R-V	c-Kit-R-V	c-Met-M-E	c-Met_pY1235-R-V	c-Myc-R-C	C-Raf-R-V	C-Raf_pS338-R-E	Caspase-7_cleavedD198-R-C	Caspase 8-M-E	Caveolin-1-R-V	CD31-M-V	CD49b-M-V	CDK1-R-V	Chk1-R-E	Chk1_pS345-R-C	Chk2-M-E	Chk2_pT68-R-E	Claudin-7-R-V	Collagen_VI-R-V	Cyclin_B1-R-V	Cyclin_D1-R-V	Cyclin_E1-M-V
Antibody Origin	R	M	R	R	R	R	R	R	R	R	R	R	R	R	R	M	R	R	R	R	M	R	G	R	R	R	R	R	R	M	R	R	R	R	R	M	R	M	M	R	R	R	M	R	R	R	R	R	M
Replicate Antibodies(0)	1	2	3	4	5	6	7	8	9	10	11	12	13	14	15	16	17	18	19	20	21	22	23	24	25	26	27	28	29	30	31	32	33	34	35	36	37	38	39	40	41	42	43	44	45	46	47	48	49
Sample description	X14.3.3_beta.R.V_GBL9030513	X14.3.3_epsilon.M.C_GBL9031787	X14.3.3_zeta.R.V_GBL9030514	X4E.BP1.R.V_GBL9030515	X4E.BP1_pS65.R.V_GBL9030517	X4E.BP1_pT37_T46.R.V_GBL9030516	X53BP1.R.E_GBL9030518	ACC_pS79.R.V_GBL9030519	ACC1.R.E_GBL9030520	ACVRL1.R.C_GBL9030521	Akt.R.V_GBL9030522	Akt_pS473.R.V_GBL9030523	Akt_pT308.R.V_GBL9030524	AMPK_alpha.R.C_GBL9030525	AMPK_pT172.R.V_GBL9030526	Annexin_VII.M.V_GBL9031789	AR.R.V_GBL9030527	Bad_pS112.R.V_GBL9030528	Bak.R.E_GBL9030529	Bax.R.V_GBL9030530	Bcl.2.M.V_GBL9031790	Bcl.xL.R.V_GBL9030531	Beclin.G.C_GBL9031822	beta.Catenin.R.V_GBL9030538	Bid.R.C_GBL9030532	Bim.R.V_GBL9030533	BRCA2.R.C_GBL9030534	c.Jun_pS73.R.V_GBL9030575	c.Kit.R.V_GBL9030576	c.Met.M.E_GBL9031802	c.Met_pY1235.R.V_GBL9030581	c.Myc.R.C_GBL9030585	C.Raf.R.V_GBL9031756	C.Raf_pS338.R.E_GBL9031757	Caspase.7_cleavedD198.R.C_GBL9030537	Caspase.8.M.E_GBL9031791	Caveolin.1.R.V_GBL9030539	CD31.M.V_GBL9031838	CD49b.M.V_GBL9031793	CDK1.R.V_GBL9030540	Chk1.R.E_GBL9030541	Chk1_pS345.R.C_GBL9030542	Chk2.M.E_GBL9031794	Chk2_pT68.R.E_GBL9030543	Claudin.7.R.V_GBL9030544	Collagen_VI.R.V_GBL9030545	Cyclin_B1.R.V_GBL9031824	Cyclin_D1.R.V_GBL9030547	Cyclin_E1.M.V_GBL9031832
	Median Centered	Median Centered	Median Centered	Median Centered	Median Centered	Median Centered	Median Centered	Median Centered	Median Centered	Median Centered	Median Centered	Median Centered	Median Centered	Median Centered	Median Centered	Median Centered	Median Centered	Median Centered	Median Centered	Median Centered	Median Centered	Median Centered	Median Centered	Median Centered	Median Centered	Median Centered	Median Centered	Median Centered	Median Centered	Median Centered	Median Centered	Median Centered	Median Centered	Median Centered	Median Centered	Median Centered	Median Centered	Median Centered	Median Centered	Median Centered	Median Centered	Median Centered	Median Centered	Median Centered	Median Centered	Median Centered	Median Centered	Median Centered	Median Centered
SKBR3-mCh DMSO 0h (J1 )	-0.14416	-0.290352	-0.107288	0.283577	0.402678	0.573004	0.283617	-0.140342	0.448311	-0.337877	0.260581	-0.0926028	-0.0348388	-0.0856848	0.10775	-0.222738	-0.387558	-0.295618	-0.115902	-0.158038	-0.357865	-0.355196	-0.228937	-0.37062	-0.346402	-0.359842	-0.318702	-0.213278	-0.375756	-0.161917	-0.213173	0.405433	0.407311	0.134953	-0.170207	0.113064	0.0471052	-0.305598	-0.100253	0.452185	-0.121658	-0.0176148	0.203918	-0.246732	0.342282	0.222798	0.373425	-0.161162	-0.0400396
SKBR3-mCh DMSO 10 min (J2 )	0.00831648	0.0187111	0.0868042	0.173851	0.206786	0.115953	0.0221615	0.23306	0.000891469	0.0483399	0.06496	0.644702	0.755309	-0.0514173	0.100402	-0.0348437	-0.1253	-0.0562472	-0.043155	-0.0120942	-0.0208802	-0.0293914	0.00241831	0.109476	-0.0833009	-0.0773652	0.0114902	0.126974	-0.0914026	0.0471974	-0.0194392	-0.0341076	-0.106824	0.397323	0.166537	-0.064239	0.282815	0.10166	-0.0371298	0.0467226	0.0580969	0.0971441	-0.0655755	-0.0239104	0.0219497	-0.677231	0.00528329	-0.0146049	-0.104154
SKBR3-mCh DMSO 20 min (J3 )	-0.0518531	-0.112103	-0.073425	-0.0108534	0.155307	0.257302	0.0395051	0.324555	0	-0.0831204	0.0557954	0.469434	0.278254	-0.0711159	0.118378	-0.118814	-0.235737	0.0228413	-0.168176	-0.0457929	-0.16304	-0.0646808	-0.0394911	0	-0.0704359	-0.172954	0.0899881	0.0377564	-0.057471	-0.0786307	0.0339105	0.270023	0.0870411	0.39144	-0.0234862	0.0238718	-0.307754	-0.157193	-0.0540017	0.144238	-0.0745386	0.143355	0.00690691	-0.150072	0	0.462761	0.152044	-0.0432183	-0.0902834
SKBR3-mCh DMSO 30 min (J4 )	0.0191184	0.0172178	0.0613163	0.0512799	0.108091	0	-0.0606005	0.265317	-0.214686	-0.134379	-0.0353111	-0.40424	-0.358931	0.0309798	0.135018	0.000888063	-0.20217	0.0774885	-0.131078	0.0729879	0.00134355	-0.0701958	0.0407244	0.0972161	-0.0742229	0.00702429	0.0499039	0.120983	0.0238225	0.0472955	0.0379751	0.104702	-0.227278	0.337004	0.0524452	-0.077017	-0.241639	0	-0.00331794	-0.0224697	-0.0519448	0.190004	0.0593223	-0.047723	-0.134332	-0.0545474	0.00834284	0.054414	-0.0238478
SKBR3-mCh DMSO 60 min (J5 )	-0.207865	-0.166751	-0.168768	-0.115393	0.191569	1.09326	0.262795	-0.0989045	0.64435	-0.291508	0.21819	-0.142346	-0.443457	-0.125574	0.018864	-0.438749	-0.452211	-0.11475	-0.290833	-0.0286328	-0.162553	-0.160173	-0.0482206	-0.272588	0.819851	-0.150979	-0.0436801	0	-0.30193	-0.153104	-0.00406394	1.03145	0.879085	0.0469598	-0.181266	0.0461124	-0.0808729	-0.152845	-0.252191	0.703814	-0.117386	0.0172045	0.561424	0.0148682	0.25914	1.0525	0.939696	-0.039072	0.0033198
SKBR3-mCh DMSO 90 min (J6 )	-0.0585353	-0.120042	-0.123488	-0.0843607	0.115254	0.623739	0.0595544	-0.121373	0.440059	-0.172263	0.106118	-0.383297	-0.448344	-0.102783	-0.138615	-0.276472	-0.331809	-0.138491	-0.285098	0.0145416	-0.0424285	-0.0661453	-0.0321033	0.331357	-0.152726	-0.134335	0.0416433	-0.00214703	-0.293172	0.133612	-0.132509	0.753837	0.331809	0.0215229	-0.0942995	0.0772442	-0.180466	-0.10577	-0.215631	0.598104	0	-0.0448916	0.264332	-0.0268025	0.375109	0.526952	0.477406	0.0257966	0.0633161
SKBR3-mCh DMSO 2 h (J7 )	-0.116075	0.0895741	0.0831732	-0.0720703	-0.298359	-0.395542	-0.133179	0.0515622	-0.0997648	-0.0758146	-0.164627	-0.902276	-0.757701	0.0257245	-0.0476755	0.0454917	0.0326232	0.0177022	-0.0464117	0.0124247	0.0656403	-0.00418186	0.0166641	0.21289	-0.00608233	0.0159695	-0.203432	0.0156786	0.0801424	-0.00749751	0.00440049	-0.0415946	-0.056485	-0.102579	0.00948022	-0.0590451	0.162967	0.0352859	0.0446238	-0.229722	0.039908	0.0423346	0.0637392	-0.0544557	0.180089	-0.0644222	-0.128383	0.12291	-0.00444846
SKBR3-mCh DMSO 4 h (J8 )	-0.057425	-0.115699	-0.177678	-0.117704	0.251729	0.79351	0.0786718	-0.178236	0.487351	-0.194186	0.132484	0.100525	-0.049006	-0.179406	-0.436171	-0.320853	-0.437519	-0.283139	-0.233699	-0.0294905	-0.0833601	-0.132273	-0.187379	-0.0674663	-0.259209	-0.110724	0.106715	-0.0908933	-0.232562	-0.00716097	-0.156966	0.42195	0.651168	0.0535526	-0.053606	0.233149	-0.320105	-0.130278	-0.0606039	0.492577	-0.00258228	-0.093397	0.453019	-0.0798754	1.20747	0.39539	0.6716	0.0476947	0.168398
SKBR3-mCh DMSO 8 h (J9 )	-0.17571	-0.0297819	0.00585498	0.111413	0.033404	0.338135	-0.113717	-0.0997472	-0.122786	-0.205437	0.0822366	-0.249132	-0.212757	-0.134411	-0.262192	-0.00191749	-0.241642	-0.20449	-0.00802157	-0.0395791	-0.00593147	-0.038464	-0.00219551	0.0473101	-0.10026	-0.0724943	-0.099129	0.00124009	0	-0.0457392	-0.0855115	0.421628	0.210476	0	-0.0344065	-0.0291209	-0.0722485	-0.0308843	-0.00783238	0.261537	-0.0301407	-0.023961	0.0168461	-0.159854	0.379427	0.00627986	0.313511	-0.0217463	0.0638398
SKBR3-mCh DMSO 24 h (J10 )	-0.102787	-0.0148012	-0.0113621	-0.114234	-0.00700628	0.0662091	-0.275438	-0.0877255	-0.45322	-0.133463	0.070342	0.229625	0.344683	-0.113728	-0.198435	-0.0299869	-0.12258	-0.0531579	0.162423	0.0834388	0.03787	0.0902961	-0.013717	0.15836	0.0196016	0.0345773	-0.0110443	-0.0265913	0.0900313	-0.0496833	-0.000692952	0.0606459	0.0418821	0.0850717	0.028145	-0.14342	-0.112607	0.00727327	0.0952806	0.0502283	-0.0235119	0.0156787	-0.0847911	-0.0216062	0.256268	0.0570968	0.0694465	0.0313976	-0.039481
SKBR3-mCh DMSO 25h (J11 )	-0.377824	-0.20925	-0.296949	-0.144188	0.186393	1.04788	0.0774501	-0.279059	0.453375	-0.350462	0.49871	1.06427	0.703412	-0.244464	-0.45533	-0.5432	-0.537284	-0.267671	-0.117194	-0.115138	-0.26077	-0.1395	-0.195293	0.0331335	-0.170908	-0.240452	-0.301476	1.02987	-0.241917	-0.129569	-0.071756	0.994912	1.04658	-0.283164	-0.258883	0.244251	-0.360857	-0.384401	-0.0643919	0.470018	-0.176555	-0.110162	0.673706	0.0309685	1.26742	1.30451	1.12636	-0.0852737	0.172037
SKBR3-mCh DMSO 48 h (J12 )	-0.124775	-0.3257	-0.192786	0.0793816	0.418003	0.800273	0.103889	-0.265265	0.323379	-0.263433	0.586585	1.60781	1.66722	-0.125313	-0.551627	-0.442358	-0.302681	-0.346573	-0.0766077	-0.223498	-0.261029	-0.141626	-0.248674	-0.0659574	-0.148561	-0.195775	-0.22658	-0.0636341	-0.0953824	-0.193552	-0.129764	0.400574	0.809063	-0.0798997	-0.271874	0.159145	-0.464098	-0.373076	-0.180015	0.315797	-0.136744	0.00493915	0.530493	-0.0297353	0.800253	1.09757	0.86344	-0.132351	0.00630948
SKBR3-mCh DMSO 72 h (J14 )	-0.0845348	-0.368559	-0.130575	0.500298	0.479028	0.495926	0.0564857	-0.385901	0.0250768	-0.230465	0.192434	0.907358	0.933764	-0.0296155	-0.402672	-0.218586	-0.438708	-0.308469	0.0647914	-0.217289	-0.430291	-0.198363	-0.425524	-0.358815	-0.16977	-0.336888	-0.390131	0.13492	-0.280315	-0.00236582	-0.0414544	0.584632	0.107415	0.0494829	0.0539081	-0.163199	-0.264125	-0.317725	-0.286578	0.139005	-0.0795465	-0.122549	0.169888	-0.0474424	0.0785836	-0.20893	0.329339	-0.0837175	-0.169743
SKBR3-mCh Lap 0h (J15 )	0.0528122	0.0365526	-0.00167874	0.12151	0.0986904	0.0350293	-0.0292897	0.191444	-0.114499	0.0373773	0.0264137	-0.204929	0.0261154	-0.0423219	0.284728	0.022642	-0.107597	0.0284948	0.0198325	0.0243821	0.0930348	0.0281942	0.0384587	0.0889435	0.0317753	-0.00189244	0.00234721	0.0361396	-0.0219466	-0.037368	0.0605783	-0.0689469	-0.126728	0.276827	0.215274	-0.0400057	-0.0983187	0.0619781	0.0493191	0.128423	0.0228704	0.144157	-0.110943	0.0581447	-0.061454	-0.488864	0.0131217	0.00138281	-0.100544
SKBR3-mCh Lap 10 min (J16 )	0.0690441	-0.00747981	0.00212401	0.103142	0.0940873	0.0562584	-0.084994	0.233696	-0.0985561	0.0785109	-0.0134586	0.513936	0.491061	-0.0348525	0.123474	0.0339308	-0.13371	-0.0341429	-0.00080624	0.0142432	0.0095571	0.028378	0.00157485	0.0669513	-0.0697189	0.0115801	-0.0254053	0.0917805	0.0579736	-0.00461866	0.0577985	0.0812031	-0.155081	0.482121	0.0982615	-0.0570883	0.00469625	0.0693205	0.136006	0.0954439	0.0556066	0.144327	-0.0465263	-0.0461776	-0.116163	-0.420754	0.0425987	0.00162012	-0.0607078
SKBR3-mCh Lap 20 min (J17 )	0.0274543	0.0797808	0.0721521	0.0103663	0.0408866	-0.0560308	-0.096778	0.37344	-0.268254	-0.0708249	-0.0150327	0.0140328	-0.184058	-0.0160898	0.133032	0	-0.101911	0.0262284	-0.136737	0.0708813	0.0282808	0.065096	-0.0233523	0.00088896	0.00171099	7.69549e-05	0.0787231	0.0612825	0.0284213	0.0128334	0.0524201	-0.035915	-0.284024	0.370667	0.0522221	-0.135042	-0.322637	-0.0341236	0.00847386	-0.0290264	0.0144721	0.199837	-0.00441787	-0.0385067	-0.176059	-0.0312421	-0.0250442	0.0119767	-0.0245877
SKBR3-mCh Lap 30 min (J18 )	-0.030643	0.0151551	0.0304034	-0.0251881	0.054888	0.152885	-0.0620991	0.148855	-0.125759	-0.0613136	0	-1.49382	-1.31031	-0.0129282	0.0393028	0.00279553	-0.148239	0.0616185	-0.0869404	0.0221936	0.00883636	-0.00891904	0.0471546	0.00497258	-0.0228323	0.0287619	0.0443126	0.024814	-0.0116501	-0.00561306	0.0400098	0.148645	-0.0127271	0.134324	-0.000546284	0.0547298	-0.0964179	0.0150144	-0.013033	0.123355	-0.0260349	0.237159	0.0241337	-0.0968939	0.0597603	-0.0235811	0.0871548	-0.011416	-0.00491772
SKBR3-mCh Lap 60 min (J19 )	0.021157	0.0109352	0.0695364	0.103713	-0.0374699	-0.0119965	-0.0403738	0.025106	-0.0760366	-0.0742636	-0.00013545	-2.74953	-2.16111	0.0969778	0.182633	0.048033	-0.154822	0.0288668	-0.103612	-0.0148459	-0.00752123	0.0516085	0.0544844	-0.0212725	-0.0164159	0.131674	0.0588568	0.0686353	-0.0667226	0.0469747	0.0444884	0.294634	0.0251993	-0.266939	0.0138881	0	-0.350979	-0.103928	-0.0547377	0.108181	0.0485969	0.149198	0.104657	-0.0505594	0.0603638	0.167784	0.177869	-0.0445451	0.0487989
SKBR3-mCh Lap 2 h (J21 )	0.00406324	0.0482107	0.0471789	-0.120847	-0.19534	-0.119966	-0.170392	-0.035369	0.120474	-0.0501939	-0.202501	0.172398	0.260675	-0.0231241	-0.09589	0.0620716	0.0920138	0.0605457	-0.108821	-0.0355886	0.112648	-0.0494275	0.0579379	0.135387	-0.065899	0.00127976	-0.223515	-0.0605241	-0.04836	-0.0198095	-0.0301991	0.0181015	-0.111938	-0.0377898	0	0.0220813	0.0888451	0.0885762	0.0471935	-0.145973	-0.0218612	-0.0204863	-0.000530305	-0.11011	0.16881	-0.11283	-0.159102	0.0882035	0.0189763
SKBR3-mCh Lap 4 h (J22 )	-0.0153044	0.0160922	0.0508844	0.0734322	-0.225258	-0.185003	-0.00762489	0.00156285	-0.0608383	-0.0607707	0.0111258	-2.97	-2.20387	-0.0264808	-0.245109	0.0501395	-0.110196	-0.209039	-0.0264149	0.0490244	0.0186962	0.0726929	-0.0525371	0.0682815	0.00320333	0.108841	0.0502384	0.0269801	-0.0694831	0.0177398	-0.0354212	-0.560693	0.0196938	-0.296536	0.0219405	0.0634481	-0.32061	0.100076	-0.0130201	0.0645103	-0.0226154	-0.0316406	0.126912	-0.160078	0.591658	0.27381	0.130101	0.00190691	0.00125006
SKBR3-mCh Lap 8 h (J23 )	-0.0706808	-0.0118461	-0.00129646	0.235151	-0.31113	-0.167956	-0.0830912	0.0672402	-0.199738	-0.121923	-0.0129921	-2.87088	-2.14479	-0.0922797	-0.20841	0.0438544	-0.165108	-0.131954	0.0157414	0.092151	0.0555146	0.0502402	-0.0300819	0.0388998	0.0271928	0.10235	0.0231265	-0.288317	0.0389994	-0.0502117	-0.0510069	-0.406544	-0.00216322	-0.214761	0.0312693	0.0603432	-0.0285493	0.0522643	0.00751844	0.203138	-0.0477921	-0.0782313	0.0822554	0.0324521	0.143021	0.131187	0.235723	0.00450269	-0.101523
SKBR3-mCh Lap 24 h (J24 )	0.0197932	0.108839	0.088585	0.173158	-0.254843	-0.148622	-0.0957754	0.06097	-0.429589	0.081125	-0.0249835	-1.82526	-1.40932	-0.167876	-0.278046	0.122134	-0.179168	-0.118012	0.148592	0.0550828	0.176355	0.11851	0.101461	0.13553	0.0545642	0.37733	0.0226396	-0.0298356	0.0853134	0.12771	0.103096	-0.497737	-0.15981	-0.121914	0.314463	-0.0808477	-0.0115797	0.308528	0.200901	-0.244264	-0.0349553	-0.231993	-0.0122365	0.0780986	-0.0260816	-0.111933	-0.486623	0.0643789	-0.221149
SKBR3-mCh Lap 25 h (J25 )	-0.0132976	0.0411999	0.014348	0.0567654	-0.263241	-0.176354	0.036768	0.0199873	-0.401047	0.0420699	-0.0244518	-1.91511	-1.52077	-0.101041	-0.27478	0.0685623	-0.164683	-0.0355474	0.186488	0.0230788	0.153321	0.147355	0.183341	0.168787	0.113921	0.413435	0.0909182	0.0791583	0.106875	0.048748	-0.0188893	-0.308567	-0.049255	-0.18883	0.298721	-0.0508874	-0.00109954	0.275938	0.149434	-0.239225	-0.0514737	-0.212366	-0.0182055	0.0562928	0.0171276	0.0143291	-0.485222	-0.000932875	-0.245172
SKBR3-mCh Lap 48 h (J26 )	-0.00947708	0.0647194	0.0917141	0.0521055	-0.224015	-0.298233	0.0562055	0.107233	-0.615519	0.137548	3.11668e-05	-1.07498	-0.855986	0.0060881	-0.395012	0.0821151	-0.116128	-0.0515356	0.141232	0.0585833	0.175459	0.128978	0.164549	0.217453	0.101767	0.677071	0.0298033	-0.0490424	0.194022	0.0414593	0.0722525	-0.537942	-0.110843	-0.15917	0.279356	0.00880329	0.0638695	0.399382	0.255247	-0.433747	-0.0198542	-0.215524	0.00987584	0.113743	0.531623	0.0290889	-1.96892	0.0933848	-0.078943
SKBR3-mCh Lap 72 h (J28 )	0.0675973	-0.102408	0.0333985	0.561192	0.0204111	0.436243	-0.412826	-0.158716	0.0511996	0.112342	0.201787	-0.496237	-0.678082	0.102075	-0.454712	0.163534	-0.204491	-0.273355	-0.0868999	-0.0634252	-0.0725338	-0.164575	-0.0739333	-0.219226	-0.218959	0.276963	-0.123879	-0.179897	0.0846283	0.0174087	-0.0771788	-0.092519	0.308222	-0.158555	0.104504	0.0311666	0.32546	0.160992	0.208726	-0.460992	-0.0383519	-0.344244	0.348084	-0.0997845	1.73652	0.476793	-1.96668	-0.00741485	0.150555
SKBR3-E545K DMSO 0h (J29 )	-0.00652941	-0.19764	-0.0127399	0.147207	0.177251	0.362532	0.114034	-0.0563807	0.421647	-0.169917	0.0588714	-0.755897	-0.825403	0.115912	0.287809	-0.0605941	-0.0867612	-0.112591	-0.0648581	-0.0344631	-0.287975	-0.125501	-0.220188	-0.277537	-0.0576382	-0.276045	-0.248728	-0.0873487	-0.213047	-0.00877817	-0.109702	0.0117289	0.132059	-0.0445144	0.0315056	0.113624	-0.0823738	-0.21022	-0.226965	0.19312	-0.12793	0.128016	0.184669	0.0660682	0.28515	-0.322796	0.0860959	-0.0798424	-0.0196364
SKBR3-E545K DMSO 10 min (J30 )	0.00887992	0.093907	0.056318	0.0593059	0.0159699	0.0386466	0.0549228	0.27193	0.147479	0.0659395	-0.094557	-0.424965	-0.330559	0.00859187	0.298399	-5.60495e-05	0.0499262	0.0611761	-0.0532697	0.0221446	-0.0388062	0.107152	0.031663	0.0666993	0.0550248	-0.017818	-0.0372558	0.15142	0.0265751	-0.0375633	0.0284444	0.000640389	-0.0313135	0.125644	0.0936195	0.0221147	0.0276039	0.0748451	0.0934826	-0.126771	0.107588	0.131846	-0.097864	0.103535	-0.0651785	-0.408958	-0.124083	0.006505	-0.0674243
SKBR3-E545K DMSO 20 min (J31 )	-0.288202	-0.308246	-0.16077	0.164268	0.255167	0.603406	0.295685	-0.0150847	0.506597	-0.452923	0.171032	0.369405	-0.0755724	-0.220653	0.0464599	-0.293082	-0.335025	-0.354578	-0.410956	-0.238006	-0.521814	-0.406032	-0.392781	-0.511306	-0.396453	-0.485999	-0.338964	-0.445927	-0.252032	-0.187318	-0.228097	0.14261	0.287435	0.0187243	-0.577845	0.119391	-0.0519367	-0.49609	-0.391288	0.275004	-0.271339	0.130193	0.411657	-0.217633	0.086659	0.129218	0.312624	-0.297591	0.0502292
SKBR3-E545K DMSO 30 min (J32 )	-0.0191497	-0.0473029	0.0172189	0.000811435	0.0256902	0.0155708	-0.054921	0.281332	0.066643	0.0139976	-0.1305	-0.0700182	0	0.0247364	0.275497	0.0157025	0.0432179	0.0530585	0.0361983	-0.0357659	-0.092333	0.0430194	-0.00270363	-0.0180451	0.0375093	0.00262693	0.0509806	0.0545969	0.0277918	-0.0771706	-0.0144775	-0.0368795	-0.0247572	0.0958605	-0.0612625	-0.0481283	-0.124677	0.0267815	0.0115569	-0.000254735	0.0142853	0.20427	-0.101984	-0.0229975	-0.0447343	-0.333514	-0.0956142	-0.0602956	-0.0624178
SKBR3-E545K DMSO 60 min (J33 )	0.0249002	-0.0316164	-0.0578008	-0.0330346	-0.0644693	0.071307	-0.00589112	0.109511	0.00985748	0.0307387	-0.113935	-0.0366282	-0.200707	0.0205317	0.45137	-0.035051	0.0820941	0.00254681	-0.0435931	-0.0726652	-0.0908053	0.0873864	-0.0849543	-0.0622977	0.0682143	-0.100996	0.0229007	-0.0121518	-0.0572006	-0.0333783	0.0261556	-0.110274	0.0371287	0.0115695	-0.00693802	-0.0862737	-0.0481714	-0.0516833	-0.0145856	-0.0739745	0.0276236	0.121407	0.0221671	-0.00881002	-0.0179252	-0.267467	-0.0212822	-0.110102	-0.0613119
SKBR3-E545K DMSO 90 min (J34 )	-0.253876	-0.122462	-0.190584	-0.297411	-0.0776505	0.774826	0.0482199	-0.266545	0.824649	-0.227695	-0.0744461	0.40871	0.0830699	-0.149198	-0.196126	-0.367605	-0.319401	-0.179505	-0.32574	-0.0225689	-0.197127	-0.207535	-0.208766	-0.342493	-0.241258	-0.216662	-0.227415	-0.221581	0.51688	-0.138965	-0.138178	0.579249	0.658673	0.00789532	-0.204314	0.256389	-0.283516	-0.193222	-0.128375	0.351176	-0.0770539	-0.0176358	0.413978	0.0629179	0.837124	0.327102	0.406227	-0.0739657	0.0540771
SKBR3-E545K DMSO 2 h (J35 )	0.0651621	-0.0625045	-0.0757077	0.164834	-0.288415	0.221572	-0.0868186	-0.125618	0.883627	-0.0445512	0.0584623	-1.48827	-1.60169	0.10279	-0.315243	-0.144554	0.0284824	-0.160911	-0.17741	-0.0524028	-0.074554	-0.116898	-0.0477351	-0.0577843	-0.138168	-0.109349	-0.177827	-0.150033	-0.265965	-0.0632197	-0.0524482	0.283425	0.651294	-0.144782	-0.201951	0.36473	-0.250218	-0.108939	-0.0325928	0.424849	0.0496321	0.0851027	0.513969	-0.0179729	0.754351	0.252952	0.632459	0.0176613	0.169719
SKBR3-E545K DMSO 4 h (J36 )	-0.221764	-0.252074	-0.0427648	0.113619	0.148457	0.499537	0.192238	-0.422963	0.46795	-0.289578	0.0826528	0.152631	0.209089	-0.159775	-0.618468	-0.0733798	-0.208648	-0.382278	0.0300994	-0.232258	-0.335507	-0.245035	-0.299735	-0.227516	-0.134202	-0.353925	-0.275486	-0.393395	-0.252483	-0.000180287	-0.293917	0.242868	0.312546	-0.131332	-0.231332	0.133914	-0.0881682	-0.332595	-0.421771	0.278717	-0.171095	-0.147149	0.326723	-0.0854595	0.61357	-0.140026	0.347633	-0.160099	0.0178401
SKBR3-E545K DMSO 8 h (J37 )	-0.0816646	-0.24853	-0.0504171	0.060034	0.241883	0.465777	0.11417	-0.452061	0.26144	-0.186328	0.117438	0.125917	0.030553	-0.0735253	-0.337302	-0.112874	-0.0832319	-0.168578	0.0459084	-0.049937	-0.401917	-0.0472028	-0.315284	-0.259467	-0.0608194	-0.237408	-0.283993	-0.233011	-0.232599	-0.00490383	-0.292254	0.27911	0.36944	0.0108571	-0.142622	0.0496177	-0.000155543	-0.317528	-0.11819	0.3044	-0.0872995	-0.062761	0.27245	-0.0414644	0.302391	-0.0076663	0.556343	-0.135726	0.0990455
SKBR3-E545K DMSO 24 h (J38 )	-0.0957617	-0.082534	0.0207551	-0.0570246	0.123211	0.142797	-0.120104	-0.193247	-0.0517616	0.0443362	0.0472131	0.936988	0.766893	-0.067689	-0.20482	-0.0845743	0.0261118	-0.0898275	0.15616	0.0990377	-0.255833	0.0710888	-0.0971388	-0.0279735	0.0280553	0.0197367	0.0588219	-0.0141943	-0.035367	-0.10722	-0.0188509	0.166683	0.199447	0.129486	0.0599444	-0.0651925	0.233409	-0.0658219	-0.0802191	-0.130592	0.0736169	-0.0155748	-0.0913128	-0.0920564	0.530476	-0.714781	0.251127	-0.0990441	0.0496433
SKBR3-E545K DMSO 25 h (J39 )	-0.167723	-0.131336	-0.00345683	-0.0940334	0.0962342	0.189058	0.0253674	-0.306942	-0.0809649	0.0435476	0.123636	1.2522	1.22057	-0.0306633	-0.383414	-0.121746	0.0557802	-0.0438967	0.203751	0.055052	-0.311388	0.144086	-0.0589816	-0.05183	0.139518	-0.0102671	0.0056945	-0.031831	-0.0558424	-0.0232851	-0.0287668	0.287445	0.234637	0.122092	-0.0507412	-0.0963138	0.204689	-0.0897064	-0.111686	-0.0421589	0.0410772	-0.0205172	-0.0198543	-0.0936162	0.543633	-0.749992	0.255548	-0.0714799	0.0839835
SKBR3-E545K DMSO 48 h (J40 )	-0.398481	-0.470085	-0.15161	0.31269	0.579225	0.624705	0.238906	-0.6533	0.33705	-0.374055	0.608985	2.18549	2.31495	-0.207085	-0.622482	-0.25496	-0.307953	-0.372229	0.0287401	-0.371579	-0.606981	-0.244983	-0.567913	-0.664964	-0.133167	-0.473796	-0.522657	-0.192616	-0.313178	-0.0901301	-0.256073	-0.0519055	0.655981	-0.0424032	-0.467476	-0.00245393	-0.294822	-0.617698	0.0710312	0.197176	-0.0688242	-0.144676	0.533361	0.111521	0.561943	-0.0125629	0.820375	-0.140886	-0.0190902
SKBR3-E545K DMSO 72 h (J42 )	-0.167832	-0.24511	-0.0201023	0.412106	0.520575	0.4616	0.235048	-0.21813	0.285909	-0.152337	0.406022	1.6619	1.52086	-0.102087	-0.0207138	-0.0754429	-0.0519975	-0.00748691	0.030191	-0.0206685	-0.312071	0.0443242	-0.267189	-0.362102	0.0529485	-0.05595	-0.321948	-0.0437649	-0.0944476	-0.0201438	-0.0903172	-0.0499239	0.329441	0.172919	-0.0640043	-0.01442	-0.22373	-0.290582	-0.254874	0.191039	-0.0284816	-0.0657958	0.321483	0.0720018	-0.103891	-0.154773	0.504849	-0.0778097	-0.111262
SKBR3-E545K Lap 0h (J43 )	-0.125515	-0.177396	-0.192512	0.0659232	0.382613	0.693919	0.191187	-0.00547251	0.927244	-0.204595	0.193029	-0.706822	-0.982965	-0.0377321	0.298801	-0.258628	-0.0229333	-0.220844	-0.27602	-0.180344	-0.313083	-0.239384	-0.194654	-0.317055	-0.202412	-0.341454	-0.136676	-0.197385	-0.229993	-0.124994	-0.176944	0.325163	0.667279	0.101825	-0.349557	0.256957	-0.403169	-0.240251	-0.0502143	0.423651	-0.151518	-0.0289526	0.367307	0.00194837	0.517765	0.020908	0.487291	-0.166979	0.0356222
SKBR3-E545K Lap 10 min (J44 )	0.0931511	0.152536	0.0489639	-0.10701	-0.0477088	-0.140695	-0.0928165	0.356024	-0.0315127	0.283069	-0.060536	-0.360516	-0.431784	0.0372232	0.407604	0.0386176	0.116596	0.0305046	-0.112183	0.0383367	0.00426803	0.071559	0.0662884	0.0400529	0.0385293	0.0198208	0.0668989	0.0557779	0.115967	0.0120086	0.0980162	-0.136736	-0.184631	0.106123	0.0689218	-0.0110456	0.0572501	0.0710216	0.041752	-0.0298519	-0.0262453	0.156331	-0.0939876	0.101778	-0.301152	-0.242304	-0.152238	-0.0137057	-0.0227996
SKBR3-E545K Lap 20 min (J45 )	0.0210103	0.0641176	0.0533772	-0.0372386	0.0744869	0.0933499	-0.0740868	0.452133	0.314033	0.0514098	-0.0878676	-0.261816	-0.377006	0.0681978	0.488947	0.0500182	0.0500261	0.147291	0.0347712	0.0795309	0.00637751	0.00553826	0.0760742	-0.017814	-0.0184764	0.0372475	-0.116701	0.0440591	0.0373343	-0.0329267	-0.0115227	0.123635	-0.0799529	0.199466	0.039227	0.0203302	0.0845334	0.0352865	0.0464155	0.2071	0.0423796	0.15755	-0.0617831	0.0445773	-0.327832	-0.214355	-0.152112	-0.0468264	-0.0444223
SKBR3-E545K Lap 30 min (J46 )	0.0512828	0.0622061	0.0297113	0.0770254	0.0162938	-0.0172109	0.0160738	0.294509	0.0562661	0.130071	-0.115312	-0.460801	-0.494526	0.0450955	0.350947	0.0309104	0.0862121	0.0539515	0.0026124	-0.0839406	0.0263732	0.0604762	-0.0224035	-0.038277	0.023521	-0.0684027	0.100501	0.0998792	0.0323981	0.0296153	0.0337572	-0.118308	-0.0677306	-0.0191673	0.0601539	-0.0997267	0.4275	0.0193126	0.0105428	-0.0714683	-0.00381583	0.112801	-0.0316325	-0.0204348	-0.0323802	-0.455561	-0.168424	-0.110556	-0.0469098
SKBR3-E545K Lap 60 min (J47 )	0.0164542	0.0234108	-0.0293089	-0.149579	-0.129317	-0.176717	-0.0145658	0.127361	0.0249691	0.11876	-0.169183	-0.860421	-0.909854	0.0227213	0.366003	-0.0294417	0.130338	-0.0398731	-0.0725086	-0.0372236	0.0220419	0.0741151	-0.0279785	0.0247631	0.0420773	-0.0932253	0.154628	0.0265869	0.0328426	-0.000236702	0.0451866	-0.0242382	0.0386211	-0.0767556	0.0351608	-0.108776	-0.398211	0.0198845	0	-0.176643	0.0312961	0.125957	0.00844249	-0.0205007	0.0600176	-0.293841	-0.119003	-0.0036418	-0.0491576
SKBR3-E545K Lap 90 min (J48 )	0.0291248	0.160139	0.0236488	-0.11547	-0.227721	-0.361331	-0.0912378	0.114264	0.0812776	0.0690103	-0.121426	-1.38926	-1.30034	0.0211765	0.152801	0.0984997	0.131957	-0.0641626	0.0210121	0.00894675	0.164773	-0.0622168	0.067624	0.0673467	0.00231306	0.0120901	0.0170834	0.0162582	0.0770157	0.0687284	0.0873188	0.037181	-0.015301	-0.0638675	0.0467257	-0.0207523	-0.0288485	0.223192	0.162255	-0.113111	0.0229401	0.0103053	0.0047677	-0.104819	-0.070347	-0.203006	-0.111599	0.00350155	0.0110611
SKBR3-E545K Lap 2 h (J49 )	0.0738248	0.110926	-0.00112826	-0.0592874	-0.156361	-0.0611856	-0.184229	-0.0716741	0.221038	-0.030499	-0.149449	0.188895	-0.0331748	0.0221584	-0.108496	0.0869951	0.0814334	-0.0230556	0.0652665	0.0285939	0.172724	-0.0657928	0.106241	0.0819846	-0.0702746	0.0388509	-0.103593	-0.098884	-0.0132002	0.0578715	0.0137399	0.235167	0	0.0805244	0.0492774	0.00355629	0.10722	0.115924	-0.198788	0.0253265	0.103585	-0.0904439	-0.0346495	-0.0589311	-0.236407	0	-0.163631	0.0675655	-0.0925975
SKBR3-E545K Lap 4 h (J50 )	0	0.101291	-0.0294883	-0.0106807	-0.229423	-0.264059	-0.0467418	-0.0360052	-0.160154	-0.0530909	-0.0951826	-1.14088	-1.21498	0.0375563	-0.169305	0.0223611	0.152269	-0.0123287	0.193072	0.123266	0.120308	0.0645535	0.020946	0.0334265	0.0193655	0.058224	-0.0435834	-0.0275663	0.0489924	0.0483511	0.0441367	-0.376301	0.0165209	-0.144611	0.126341	-0.00992991	-0.112861	-0.0113014	-0.0226566	0.0344449	0.0241478	0	-0.0062167	0.0721136	0.0442189	0.16405	0	-0.016267	-0.0925191
SKBR3-E545K Lap 8 h (J51 )	-0.0993638	-0.0167695	0	0.0102906	-0.201223	-0.0754049	0.116078	0.0938074	0.0213285	-0.102664	0.070228	-1.19647	-1.30837	0.065024	0	-0.0627977	0.147712	0.0310096	0.092648	0.099601	-0.0651807	0.0257637	0.0367921	-0.0505249	0.00523678	0.0310194	0.0229564	-0.0368295	0.0235146	-0.023506	-0.0238094	-0.109447	0.227778	-0.0996902	-0.0674943	0.0698009	0.119086	-0.0631917	0.148774	0.234427	0.0133054	-0.108864	0.0492138	0.045775	-0.193295	0.238863	0.33751	-0.00687572	-0.17174
SKBR3-E545K Lap 24 h (J52 )	-0.0430594	0.0209674	0.0103349	-0.118901	-0.149257	-0.0919752	-0.0326023	0	-0.277972	0.0237389	0.0638901	-0.0626054	-0.246495	0.0155651	0.0479612	0.0400077	0.215869	0.108075	0.100791	0.0887536	0.0784296	0.0929739	0.119116	0.108574	0.0833566	0.187048	-0.0416238	0.0461328	0.0936742	-0.0470206	0.0223101	-0.118872	-0.000407635	-0.0115108	0.0329117	-0.0122285	0.07969	0.102014	0.0960707	-0.164357	0.00336305	-0.173903	-0.072191	0.0510196	-0.0825178	-0.00890486	-0.413758	-0.0115086	-0.0593476
SKBR3-E545K Lap 25 h (J53 )	0.03417	-0.0225761	0.0802307	0.126993	0.0336078	0.127694	0.287502	-0.135052	-0.00674975	0.0461612	0.291968	0.171542	-0.0322518	0	-0.17315	0.0906775	0.0219249	-0.0127672	0.170058	0	-0.0554978	0.0185558	0.00215886	-0.180391	-0.0221369	0.145787	-0.0174821	-0.0425092	0.0434036	0.0802172	-0.00197103	-0.0863799	0.203197	-0.115408	-0.0360463	0.128584	0.0699345	-0.0741239	-0.0132092	-0.251318	-0.044062	-0.209165	0.0462817	0.0973947	-0.0481276	0.192289	-0.532605	-0.0680151	-0.039326
SKBR3-E545K Lap 48 h (J54 )	0.0416691	-0.0222536	-0.0142037	0.029103	0.0206567	-0.0926815	0.0478158	-0.131374	-0.275994	0.11182	0.164425	0.666935	0.611272	-0.0501033	-0.320231	0.0597223	0.0442891	-0.0254882	-0.0123915	-0.0191105	0	0.0832918	0.0291951	-0.112088	0	0.227633	0.0752811	0.0907824	0.0819462	0	0.0249395	-0.291454	0.103081	-0.0757171	0.0550259	-0.0188816	-0.0831306	-0.0180573	0.0255908	-0.121454	0.0442976	-0.103487	-0.139842	0.00231492	0.183132	-0.24885	-0.205413	-0.0502905	0.0151226
SKBR3-E545K Lap 72 h (J56 )	-0.0363729	0.0386393	0.0245379	0.158096	0.075185	-0.056369	-0.201003	0.0554374	-0.152529	0.0409017	0.145754	0.204104	0.0637739	0.0723421	0.0723382	0.0184733	0.167507	0.0805082	0.0144226	-0.0287453	-0.0286886	0.0698138	0.120609	-0.214645	0.056388	0.293291	-0.117351	0.0187766	0.115679	0.0206322	0.0124022	-0.300956	-0.117917	-0.0594797	0.0303912	-0.190888	0.0402521	0.0259922	0.038073	-0.187805	-0.0642361	-0.150109	-0.0502919	-0.0374674	0.159616	0.104186	-0.271387	0.0156197	-0.108438
SKBR3-H1047R DMSO 0h (J57 )	-0.00302321	0.0916203	-0.0051933	-0.0734021	-0.0194976	0.0714753	-0.0097864	0.0113962	0.0441441	-0.128171	-0.00791932	-0.176918	0.023199	0.0057611	0.352985	-0.0569929	0	0.0552815	-0.0167321	-0.125308	-0.0830745	-0.0431384	0.0616205	-0.145287	-0.02534	-0.16405	-0.0826369	-0.0604892	-0.0668528	0.00513657	0.0493097	0	0.0486276	-0.148493	-0.0191277	0.16014	-0.379398	-0.104907	0.0555474	0.0499282	-0.0295022	0.0086694	0.170566	0.0738154	-0.114052	0.461853	-0.05516	0.0508449	0.00956762
SKBR3-H1047R DMSO 10 min (J58 )	0.133053	-0.0185914	0.0660841	0.0365635	0.133176	0.067671	0.0450576	0.19629	0.209628	0.127731	-0.0431061	0.106377	0.291128	0.0151225	0.29762	-0.0388021	0.112455	0	0.0693386	-0.0750921	-0.0373669	0.0479946	0.0931637	-0.174938	-0.0245214	-0.0846471	0.0100917	0.0617026	-0.0370682	0.0473548	0.0299812	-0.0747638	-0.0152767	0.101768	0.0392133	0.0149149	0.501909	0.00619515	-0.0381981	-0.111753	-0.0570802	0.115379	-0.113672	0.039833	-0.0935382	-0.362791	-0.102285	-0.0311666	0
SKBR3-H1047R DMSO 20 min (J59 )	0.0212139	0.0187781	0.000309043	-0.111549	-0.0661133	-0.0352063	0.0492927	0.421483	-0.0463549	0.000548595	-0.128617	0.357268	0.462813	-0.0303402	0.420028	-0.0123252	-0.0190934	0.100162	-0.067611	0.043622	0.085651	-0.0131832	0.0698789	-0.01211	0.0335852	-0.127169	0.0699445	0.0392218	-0.00359266	0.00374775	0.117127	-0.151898	-0.149443	0.03268	-0.030646	-0.00224045	-0.0203498	0.0793007	0.157607	-0.0420041	0.000332364	0.0939212	-0.0182371	0.0183914	-0.27296	-0.128312	-0.172408	0.0165757	0.026152
SKBR3-H1047R DMSO 30 min (J60 )	0.020483	0.0645113	0.0790883	-0.0716929	-0.13093	-0.174697	-0.016364	0.355918	0.0361196	0.0809804	-0.134553	0.233517	0.355475	0.012292	0.44693	0.045568	0.0246442	0.150561	-0.0211381	0.0290761	0.0810053	-0.00128471	0.0962524	0.0790297	0.000444281	-0.0779729	-0.0252373	0.0940472	0.0180223	0.0310272	0.045524	-0.238419	-0.255848	0.125999	0.0510459	0.00477358	0.0496625	0.0986501	0.147286	-0.30132	-0.000379428	0.0881211	-0.0812998	0.00826782	-0.323132	-0.0867977	-0.275099	-0.00341034	-0.0165524
SKBR3-H1047R DMSO 60 min (J61 )	-0.0979568	-0.00175401	-0.0123449	-0.0287184	-0.061347	0.0448717	0.0866148	0.0217429	0.153651	-0.107789	-0.0790381	0.290196	0.361408	-0.0169802	0.354057	-0.0378456	-0.0994994	0.0539143	-0.0701366	-0.027043	-0.0390104	-0.0813566	-0.0330129	-0.0369251	-0.0119856	-0.177444	-0.111411	-0.0248204	-0.041398	-0.0276135	-0.00311456	0.0523302	0.0756588	-0.0710564	-0.126373	0.0212242	0	-0.0208521	-0.00765322	-0.0336329	-0.0599298	0.048291	0.0885194	-0.0150484	-0.0435709	0.049128	-0.0711011	0.0223356	0.0518351
SKBR3-H1047R DMSO 90 min (J62 )	0.0920765	0.0708228	0.0395154	-0.0660092	-0.154929	-0.15353	-0.0601221	-0.0365493	0.0616476	-0.0540375	-0.24542	0.0282766	0.0567169	0.0149581	0.0424914	0.0758419	0.0247967	0.0694692	-0.00245488	-0.0279192	0.200381	-0.00719357	0.142154	0.0866134	-0.0321451	-0.00218806	-0.062872	-0.0383228	-0.051604	0.00769428	-0.0232556	0.0477829	-0.111004	0.0505524	0.0287358	0.0101728	0.148195	0.147803	-0.0357614	-0.22057	0.0853644	-0.0266845	-0.0583047	-0.0448999	-0.402365	0.0396845	-0.21712	0.107808	-0.0458918
SKBR3-H1047R DMSO 2 h (J63 )	0.01936	0.115305	-0.026138	0.10256	-0.423812	-0.54205	-0.083971	-0.152404	-0.109129	-0.0589201	-0.0222022	-3.18243	-2.30515	0.0837154	-0.0993406	0.0617468	-0.0716747	-0.0463866	0.080899	-0.0331718	0.163674	-0.00880659	0.177044	-0.000277387	-0.00188105	0.160214	0.0216885	0.0358405	0.0341845	0.0657469	0.043976	0.00305582	-0.0745552	-0.238727	0.0166786	-0.00857268	-0.272664	0.0727986	-0.101593	0.0188056	0.120167	-0.0136164	-0.00339966	0.00171297	-0.17486	0.386048	0.0242927	0.00411966	0.0122784
SKBR3-H1047R DMSO 4 h (J64 )	0.100202	0.0656671	0.0295587	-0.0491701	-0.128694	-0.173608	0.112825	-0.0286161	0.044572	0.126196	-0.0271501	0.16617	0.257078	0.0279084	-0.210345	-0.0468629	0.24801	0.0357518	0.0987197	0.0216381	0.0732772	0.0431332	0.0782048	0.113956	0.0786098	0.0633935	0.196991	0.0182705	0.0388411	0.0131896	0.0184449	0.011713	-0.049469	-0.00383776	-0.075655	-0.0454172	0.690353	0.163361	0.122752	-0.0256854	0.118016	-0.0201129	-0.174304	0.0250919	0.0843792	-0.215084	-0.0501385	-0.0243943	-0.00281187
SKBR3-H1047R DMSO 8 h (J65 )	-0.130673	-0.270041	-0.250534	-0.233504	-0.06037	0.178052	0.151113	-0.30876	0.243223	-0.239167	0.258799	0.430879	0.536459	0.0488346	-0.115099	-0.282228	0.118501	-0.201021	-0.15496	-0.196168	-0.300319	-0.167909	-0.155527	0.113496	-0.167553	-0.268351	-0.131975	-0.22656	-0.202183	-0.210909	-0.173293	0.488758	0.532404	0.0856673	-0.360846	0.136832	0.411132	-0.253816	-0.163579	0.34013	0.00782469	-0.0953734	0.29787	-0.0408971	0.264178	0.549548	0.656162	-0.117092	0.245042
SKBR3-H1047R DMSO 24 h (J66 )	0.162803	-0.041864	-0.00883504	-0.135899	0.108073	0.104241	0.0726598	-0.235959	-0.142966	0.0114434	0.159489	1.11153	1.50323	-0.030496	-0.147685	0.0463513	0.0449441	0.0417562	0.142593	-0.0352096	-0.148214	0.0522719	-0.0161429	-0.235533	0.0745	-0.0212776	0.102961	0.0570298	0.00328716	0.0579383	-0.0358322	0.0497088	0.0406375	0.0501161	-0.141174	-0.0409903	0.0329779	-0.11849	0.029213	0.0229523	0.00705371	0.0606362	-0.0682994	0	-0.0257788	0.018894	0.103498	-0.087909	0.128943
SKBR3-H1047R DMSO 25 h (J67 )	-0.0152874	-0.0541246	-0.0107329	-0.155096	0	-0.168359	0.00235306	-0.169947	-0.265442	0.024852	0.152551	1.17641	1.49241	-0.00790865	-0.130684	0.0317776	0.0080083	0.0421361	0.0618739	0.0437604	-0.0579262	0.0310571	-0.0444823	-0.205648	0.00808549	0.0167804	0.0308307	0.0261128	0.00233056	0.0294688	0.0249293	0.130702	0.0773503	-0.00849263	-0.052719	0.00313537	-0.175	-0.127513	0.0403387	0.0619949	0.00506985	0.0447781	-0.0361158	0.0409111	-0.30091	0.0594883	0.0544642	0.0396632	0.126307
SKBR3-H1047R DMSO 48 h (J68 )	-0.0820779	0.00266677	-0.0291406	0.00136121	0.151712	0.070289	-0.0152791	-0.413175	-0.269912	0	0.121965	1.67585	2.00178	-0.0295411	-0.242546	-0.0283703	-0.0993331	0.0574859	0.129728	0.00408725	-0.086707	0.116093	-0.087271	-0.217774	0.166707	0.120453	-0.0572197	0.222976	0.140524	0.0446409	0.103656	-0.24581	-0.0206539	-0.00836987	-0.0774867	-0.166162	0.031466	-0.294831	-0.0343474	-0.0523261	-0.0341374	-0.0286902	0	0.0869256	-0.294544	0.282021	0.30974	0.0144168	-0.0170314
SKBR3-H1047R DMSO 72 h (J70 )	0.00346019	0.0239744	-0.0917148	0.317565	0.208744	0.265125	-0.0341422	0.000668996	-0.0794155	0.106526	-0.0473013	1.54273	1.82887	-0.108041	0.0353248	-0.0439743	-0.00361624	0.0590574	0.0359028	-0.0319437	-0.0629965	0.0898005	-0.0573079	-0.141532	0.0550288	0.0366422	-0.173435	0.101372	0.0609275	-0.0223699	0.0750765	-0.0344499	-0.142488	0.153964	-0.016617	-0.137899	-0.00868689	-0.12367	0.0372061	0.00709643	0.0316562	-0.11912	-0.0411822	0.00318494	-0.346731	0.0107608	0.208245	0.0139012	-0.103656
SKBR3-H1047R Lap 0h (J71 )	0.112117	0.059871	0.0094245	-0.070291	-0.0190619	-0.087784	0.0344392	0.243526	0.0881957	0.0920732	-0.123229	-0.297731	0.00812848	0.031645	0.48372	0.0483383	0.0409174	0.0796954	0.0970368	0.0529326	0.0399558	-0.0379583	0.0758635	-0.116579	-0.0441246	0	-0.0132348	-0.0421899	-0.0313082	0.0097518	0.000735515	-0.0440215	-0.0617624	0.109793	-0.0197713	0.00300662	0.486138	0.0341934	0.0622929	-0.0115548	-0.0418405	0.0603215	-0.0564607	0.0923549	-0.32603	-0.179979	-0.159635	0.0255818	0.02078
SKBR3-H1047R Lap 10 min (J72 )	0.110079	-0.0326242	-0.0314906	-0.0631676	0.0502357	-0.00745698	-0.0134718	0.342636	-0.0818886	0.0835399	-0.12402	-0.0050095	0.203464	0.00306447	0.400968	-0.048551	0.0918421	0.106251	0	-0.042498	0.010438	0.12033	-0.0288195	0.0330939	0.0858386	-0.101149	0.181354	-0.00616929	0.0253871	0.0416058	0.0693552	-0.11119	-0.0117829	0.0337808	0.0205996	-0.0290492	0.36275	0.0140178	0.127008	-0.15416	0.0112955	0.097684	-0.0228883	0.121064	-0.380775	-0.264946	-0.226375	0	0.00184365
SKBR3-H1047R Lap 20 min (J73 )	0.0656642	0.0250636	0.0371854	0	-0.00263499	-0.130315	0.118895	0.566724	-0.134275	0.0434356	-0.0694978	0	0.165247	0.0654555	0.581067	-0.0376011	-0.016559	0.161183	-0.0457155	0.0790452	-0.025954	-0.0187584	-0.0230657	-0.0706812	-0.0111655	-0.0554836	0.155119	0.00484097	-0.0203252	0.0102403	0.0364705	-0.137746	-0.134461	0.105934	-0.0615712	-0.0468608	0.221931	-0.021696	0.0860929	-0.350534	-0.0553611	0.0542126	0.0249925	0.030364	-0.513529	0.112381	-0.224589	0.0319083	0.0168784
SKBR3-H1047R Lap 30 min (J74 )	-0.130521	0.0268203	-0.0390484	-0.128193	-0.0650148	-0.0542169	-0.0167812	0.344901	-0.0368541	-0.0140963	-0.0923635	0.0103984	0.0684859	0.000816561	0.404726	-0.0288632	0.00395575	0.0675585	-0.0741102	-0.0446761	0.0728008	-0.0740459	-0.0288101	0.067071	0.00855622	-0.165459	0.0186605	-0.00158693	-0.0599437	0.0836462	0.0184569	-0.0491854	-0.0773143	0.0316692	-0.109056	0.0142473	0.172459	0.066791	-0.0213234	-0.175119	0.0275387	0.0652847	-0.0337203	-0.0557533	-0.219439	-0.132242	-0.213919	0.00192987	0.0283864
SKBR3-H1047R Lap 60 min (J75 )	0.0424	0	0.0273899	-0.0225892	-0.09789	-0.124288	0.0494282	0.125732	-0.0180049	-0.0688219	-0.111519	-0.516211	-0.49016	0.0869721	0.41323	0.0613919	0.0676037	0.138745	-0.00167295	0.0240878	0.0691715	-0.00461408	0.128395	0.066038	-0.0214107	-0.0216108	-0.0443031	0.0198792	0.0213	-0.0261123	-0.00559575	0.0683907	0.00245663	-0.0607058	-0.0398919	0.0539464	0.23897	0.0866391	-0.0236624	-0.0619576	0.0653489	0.0320765	0.0324425	-0.0616464	-0.327223	0.133569	-0.114188	0.104631	0.0275088
SKBR3-H1047R Lap 90 min (J76 )	-0.00318273	0.0404374	0.0300198	0.00115883	-0.207939	-0.396786	-0.0153393	-0.00729601	0.0401964	0.0415824	-0.116704	-0.953159	-0.853464	0.0955102	0.0870875	0.0372716	0.0682173	0.0587285	-0.0406241	-0.0156494	0.130745	0	0.117132	0.103424	-0.0441684	0.00738149	-0.0363667	-0.025174	-0.00195967	0.0802365	-0.0381294	0.188232	-0.0189313	-0.10807	-0.0294715	0.0817333	0.268211	0.0642923	-0.0453615	-0.0355893	0.0563559	0.0389265	0.0167768	-0.0136791	-0.200821	0.221219	-0.118733	0.0959981	0.0109118
SKBR3-H1047R Lap 2 h (J77 )	0.0467437	0.0989031	-0.0325419	0.0203647	-0.0015178	-0.115713	-0.0714705	-0.251719	-0.0538868	-0.0518433	-0.00875407	-0.158712	-0.282973	0.103384	-0.0386988	0.00279456	-0.161394	0.0443891	0.0362304	0.0236679	0.0848687	-0.0393674	0.209288	0.119835	-0.0331666	0.0924308	0	-0.0534978	-0.0301699	0.10361	0	0.408607	-0.0489787	0.14502	-0.00170737	-0.0681742	0.340819	0.128099	0.00952042	0.16257	0.127098	-0.0216828	-0.112528	0.0279924	-0.360542	0.308514	-0.0319791	0.122735	-0.0581179
SKBR3-H1047R Lap 4 h (J78 )	-0.0768379	-0.0567159	0.00851918	-0.147904	-0.28081	-0.473819	0.124552	-0.0011142	0.0633958	0.0150832	-0.0262439	-0.68792	-0.651473	0.106852	-0.142112	-0.0185077	0.259574	0.00494144	0.0546053	0.0543082	0.0679193	0.0722925	0.0981169	0.183365	0.0921033	-0.0123919	0.106909	-0.0535373	-0.0109336	0.0889056	-0.0380199	-0.0269823	0.115802	-0.0724199	0.0492817	-0.027065	0.459144	0.0406457	-0.0599744	-0.0971994	0.128672	0.0506403	-0.0356727	0.0454182	0.129543	-0.0712684	0.018584	0.0237343	0.019019
SKBR3-H1047R Lap 8 h (J79 )	0.166472	0.0111683	0.0481751	-0.0355434	-0.289641	-0.283135	0.0312575	0.115587	-0.197571	0.172109	-0.0739974	-0.677473	-0.690974	0.0284033	0.240341	0.0901779	0.285709	-0.00950518	0.190932	0.0481159	0.0319399	0.188701	0.0792767	0.0172072	0.132125	0.0710506	0.188993	0.0296838	0.024619	0.0899797	0.0612142	-0.274061	-0.0464908	-0.0795023	0.0364793	-0.0862412	0.667928	0.134043	0.150759	0.0225246	0.170374	0.0158942	-0.10696	0.0083386	-0.249092	-0.304471	0.0534209	0.0504328	0.0266733
SKBR3-H1047R Lap 24 h (J80 )	0.115797	-0.0483076	0.0511252	-0.09693	-0.116383	-0.0657018	-0.0130819	-0.129307	-0.359089	0.0972381	0.0470341	0.238363	0.346165	0.0393794	-0.0849544	0.122861	0.0627613	-0.0183972	0.0631019	0.051091	0.0218462	-0.0115115	0.0213513	0.0214403	0.00127213	0.150854	0.0136066	0.00154282	0.000864697	0.0757878	-0.0311096	-0.181213	0.0502992	-0.0856197	-0.0142201	0.0143579	0.140436	-0.00526997	0.226781	-0.203463	0.0420038	-0.14273	0.0250499	-0.0106754	-0.0632669	-0.0493071	-0.241196	0.0434989	0.0681943
SKBR3-H1047R Lap 25 h (J81 )	0.123984	0.0109715	0.00121311	-0.040794	-0.11819	-0.130221	0.0941962	0.0263202	-0.335215	0.11001	0.0401622	0.351344	0.404802	-0.0220229	-0.00628047	0.10793	0.0914883	0.118771	0.120117	0.06517	0.00667607	0.145859	0.0387474	0.0203105	0.117077	0.162159	0.0902384	-0.0770518	0.0641198	0.103931	0.0342446	-0.168839	-0.0142021	-0.0937219	0.0149061	0.00890847	0.21275	-0.00547106	0.132282	-0.256306	-0.0318346	-0.177225	-0.082396	0.00146706	-0.309036	0.0517244	-0.307608	0.0935113	0.104375
SKBR3-H1047R Lap 48 h (J82 )	0.0448264	0.0540538	-0.00374934	-0.00543169	-0.102994	-0.0916141	0	-0.312888	-0.356773	0.0645825	0.0429585	0.831503	0.952847	0.00370093	-0.298851	0.0235451	0.0332598	0.0959375	0.0329118	0.141597	0.0647108	0.120854	0.0150263	-0.104313	0.0654942	0.200189	0.0358434	-0.0540656	0.0295846	0.117563	0.0363306	-0.29753	-0.0927456	-0.070714	0.0306246	-0.0829163	0.159908	-0.0328933	0.0658909	0	0.0755794	-0.0664929	-0.0597121	0.0165065	0.11423	0.258411	-0.0756152	0.040238	0.0636509
SKBR3-H1047R Lap 72 h (J84 )	0.0319715	-0.0476017	0.0173541	0.319903	0.209019	-0.0394018	-0.155625	0.146818	-0.28769	0.123933	0.0484111	0.695532	0.633231	-0.0550733	0.19855	0.00962124	0.112268	0.0849695	0.135985	0.0709131	0.0196103	0.176044	0	0.0568931	0.0642926	0.28404	-0.118918	0.0126254	0.0176322	-0.0146907	0.0194085	-0.319653	-0.0690067	-0.0764522	0.0681839	-0.142421	0.565869	0.0725002	0.0868519	-0.320099	0.0662052	-0.0742217	-0.125125	0.0212285	0.180079	-0.0893671	-0.340273	0.0225656	-0.03265
[truncated: 125 more columns]
