# Supplementary material for: Decoupling of the PI3K Pathway via Mutation Necessitates Combinatorial Treatment in HER2+ Breast Cancer
Source: PLoS One. 2015 Jul 16;10(7):e0133219. doi: 10.1371/journal.pone.0133219 (PMC4504492; doi:10.1371/journal.pone.0133219)
Supplement: S3 Table — (XLSX) [file pone.0133219.s010.xlsx]

## Sheet: Sheet1
Cell Line	HER2 status	PIK3CA status	PTEN status
HCC70	Non-amplified	WT	p.F90fs*9
MCF7	Non-amplified	p.E542K/p.E545K	WT
MDAMB231	Non-amplified	WT	WT
MDAMB175VII	Over-expressed but not amplified	WT	WT
MDAMB361	amplified	p.E545K mutant	WT
MDAMB453	gained/amplified	p.H1047R mutant	p.E370K
SKBR3	amplified	WT	WT
AU565	amplified	WT	WT
BT474	amplified	p.K111N mutant	WT
HCC202	amplified	p.E545K mutant	WT
HCC1569	amplified	WT	p.K267fs*9
HCC1954	amplified	p.H1047R mutant	WT
SUM190PT	amplified	p.H1047R mutant	WT
SUM225CWN	amplified	WT	WT
UACC812	amplified	WT	WT
